# Supplementary material
Source: PubMed Central journal article supplement (PMC3173126)
Supplement: supp_M111.241802_jbc.M111.241802-1.pdf [file supp_M111.241802_jbc.M111.241802-1.pdf]

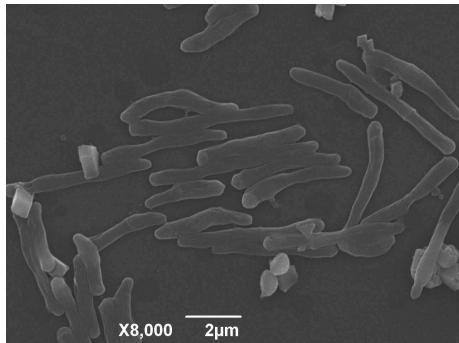

**WT**

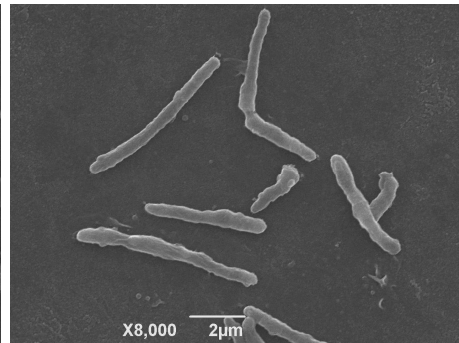

**WT 6mM H<sub>2</sub>O<sub>2</sub>**

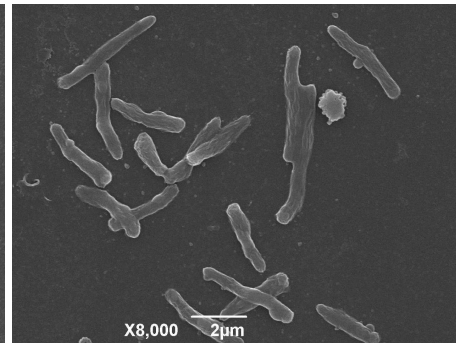

**Δ Ms2694**

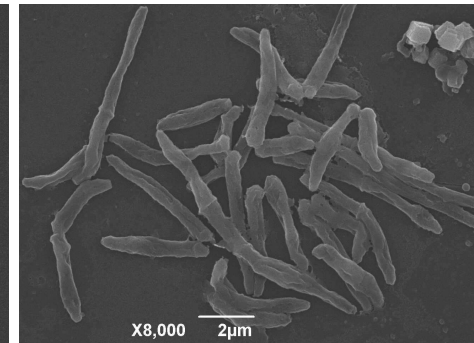

**Δ Ms2694 6mM H<sub>2</sub>O<sub>2</sub>**

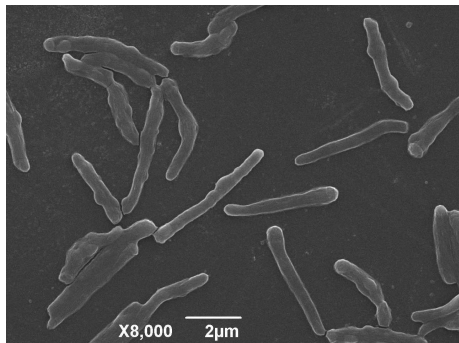

**Δ Ms2694/pMindD2694**

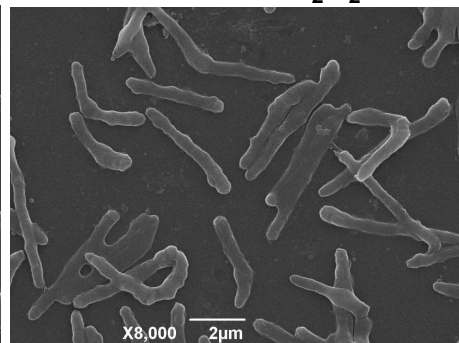

**Δ Ms2694/pMindD2694  
6mM H<sub>2</sub>O<sub>2</sub>**

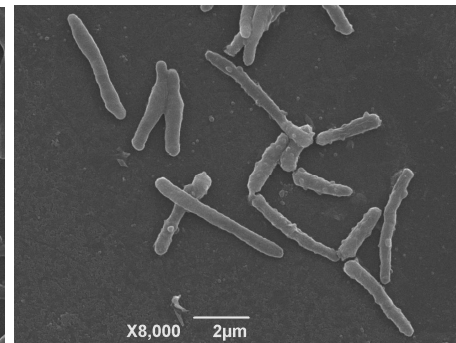

**Δ Ms2694/pMind**

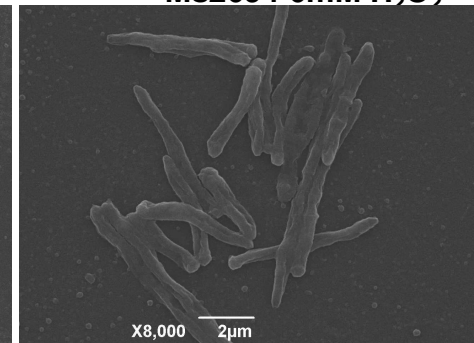

**Δ Ms2694/pMind  
6mM H<sub>2</sub>O<sub>2</sub>**
